# Supplementary material for: Lithium amidoborane hydrazinates: synthesis, structure and hydrogen storage properties
Source: Royal Society of Chemistry journal article supplement (doi:10.1039/c5ta00985e), 2015-01-01
Supplement: c5ta00985e1.pdf [file c5ta00985e1.pdf]

Supporting Information

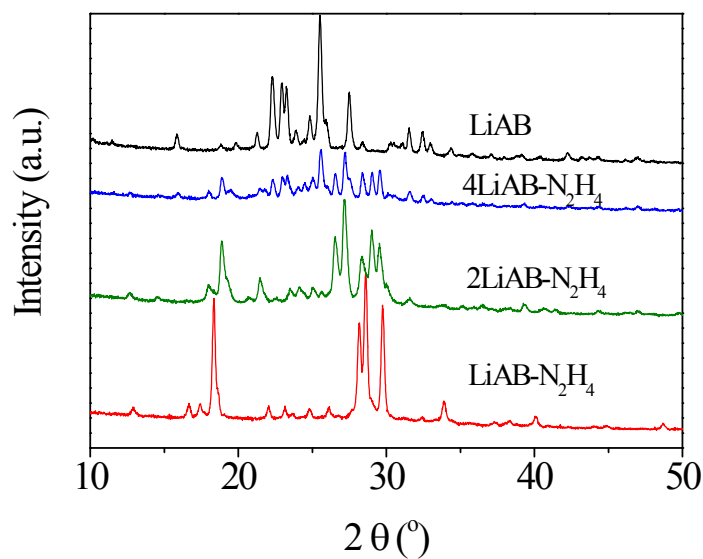

Figure S1 XRD patterns of LiAB complexed with hydrazine with different molar ratio compared with pristine LiAB.

Table S1 NH<sub>3</sub> concentrations of gaseous products from nLiAB·NH<sub>2</sub>NH<sub>2</sub>.

|                                           | 75 °C     | 170 °C    |
|-------------------------------------------|-----------|-----------|
| <b>LiAB·NH<sub>2</sub>NH<sub>2</sub></b>  | 14.1 mol% | 11.4 mol% |
| <b>2LiAB·NH<sub>2</sub>NH<sub>2</sub></b> | 0.15 mol% | 0.53 mol% |
| <b>4LiAB·NH<sub>2</sub>NH<sub>2</sub></b> | 0.09 mol% | 0.37 mol% |

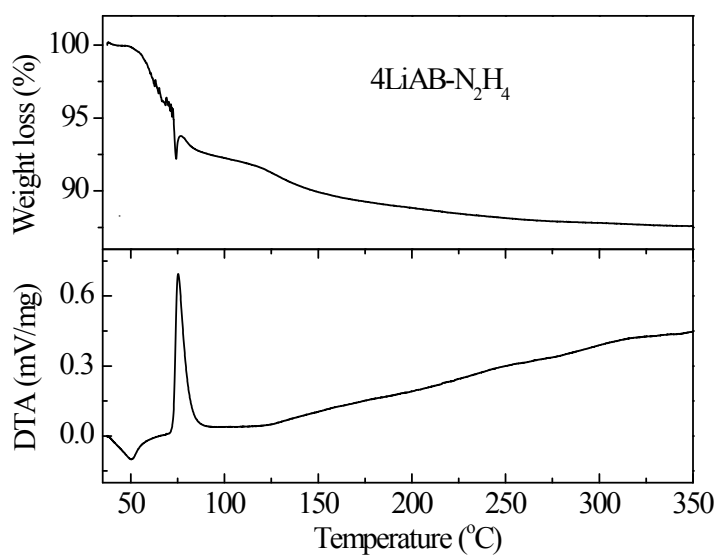

Figure S2 TG-DTA curves of 4LiAB·NH<sub>2</sub>NH<sub>2</sub>.

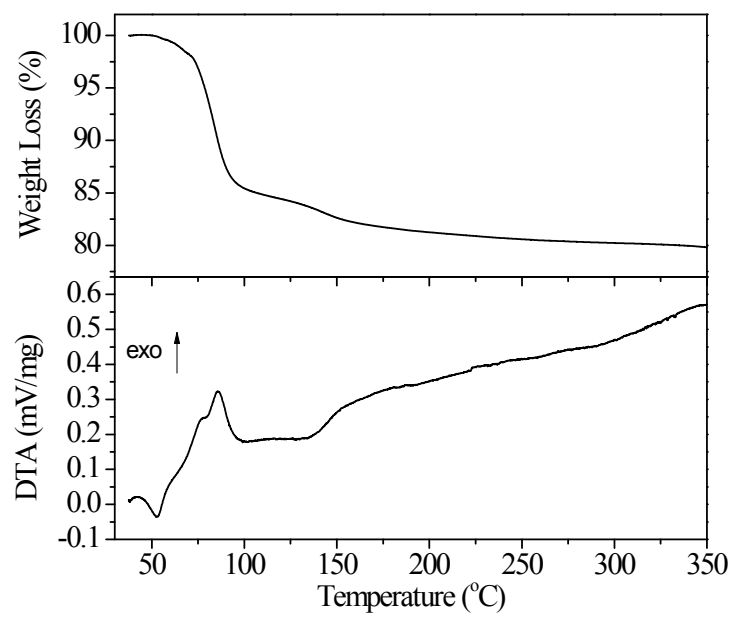

Figure S3 TG-DTA curves of  $2\text{LiAB-NH}_2\text{NH}_2$ .

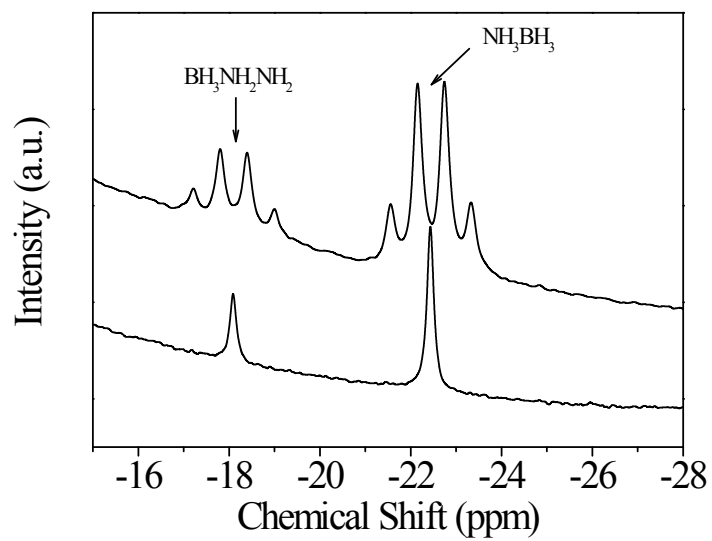

Figure S4  $^{11}\text{B}$  NMR spectra of regenerated post dehydrogenated  $4\text{LiAB-NH}_2\text{NH}_2$  sample in THF solution.
